# Supplementary material
Source: PubMed Central journal article supplement (PMC7566788)
Supplement: mmc1.pdf [file mmc1.pdf]

# Treatment of MIS-C Survey

---

Survey Date (auto-populates; not seen by user)

---

---

Thank you for agreeing to participate in this multi-center survey aimed at capturing the protocolized evaluation and management of Multisystem Inflammatory Syndrome in Children (MIS-C). In the absence of published guidelines, many centers have created individual protocols to direct treatment of this condition. The goal of this survey is to better understand how centers are constructing their protocol. Our hope is to improve the care of MIS-C by sharing pediatric hospitals' information regarding the evaluation, management, and follow-up of these patients. For any questions or concerns related to this survey, please contact Dr. Matt Oster at [osterm@kidsheart.com](mailto:osterm@kidsheart.com)

---

First Name

---

Last Name

---

Role of person completing this form. Check all that apply.

- Cardiologist
  - Intensive Care physician
  - Infectious Disease physician
  - Rheumatologist
  - Hematologist
  - General Pediatrician
  - Administrator
  - Fellow
  - Resident
  - Other (please specify)
- 

Please specify your role.

---

Email

---

Direct Phone Number

---

May we contact you if we have questions about your responses?

- Yes  No
- 

What is the name of your center?

---

---

What is your best estimate of the total MIS-C patients that your center has managed?

- 0
- 1-5 patients
- 6-10 patients
- 11 -25 patients
- >25 patients
- Not sure

---

How many pediatric beds does your hospital have?

---

---

Where is your center located?

---

---

Has your center developed an MIS-C protocol to guide evaluation and treatment?

- Yes
- No
- Not sure

---

Date of initial protocol

---

---

Has the protocol changed since it was initially created?

- Yes
- No
- Not sure

---

What changes were made to the protocol and why?

---

Date of most recent protocol

---

---

Is it possible to receive a copy of your current protocol?

- Yes
- No
- Not sure

---

Please attach a copy of your current protocol.

---

Can we publish this protocol as part of a supplement to a manuscript?

- Yes
- No
- Not sure

---

We plan to invite one person from each center that provides a copy of their protocol to be published to be included as a co-author in any manuscript that arises from this survey. Would you be interested in being considered?

Yes  No

---

Please answer the remainder of the survey according to your center's protocol.

---

Please answer the remainder of the survey based on what your center typically does for patients suspected of having MIS-C.

---

Definition of MIS-C and Inclusions Criteria for diagnosis of MIS-C

---

Does the definition or inclusion criteria for MIS-C at your center specify the presence of fever?

Yes  No

---

What are minimum days of fever required?

- 1
  - 2
  - 3
  - 4
  - 5
- 

Is there a minimum temperature specified for fever?

Yes  No

---

What is the minimum temperature?

\_\_\_\_\_

---

Is this minimum temperature Celsius or Fahrenheit?

Celsius  Fahrenheit

---

Does the inclusion criteria specify the presence of symptoms of certain organ systems or clinical features?

Yes  No

---

How many organ systems/clinical features must be involved?

\_\_\_\_\_

---

---

Which organ systems/clinical features are included as potentially meeting criteria for MIS-C at your center? Check all that apply.

- Cardiac (e.g. tachycardia, shock, chest pain)
- Dermatologic (e.g. rash) immune (e.g. lymphadenopathy)
- Extremity changes (e.g. swelling or edema of hands and feet)
- Gastrointestinal (e.g. abdominal pain, nausea, vomiting)
- Neurological (e.g. headache, altered mental status, seizure)
- Ocular (e.g. conjunctivitis)
- Oral Mucosa (e.g. dry or cracked lips, strawberry tongue)
- Respiratory (e.g. cough, shortness of breath)
- Other

---

Please specify other organ systems/clinical features.

\_\_\_\_\_

---

Does the inclusion criteria specify age?

- Yes  No

---

Please specify the upper age range (in years).

\_\_\_\_\_

---

Please specify the lower age range (in years).

\_\_\_\_\_

---

Is the lower age in months or years?

- Months  Years

---

Does the inclusion criteria specify the presence of abnormal labs?

- Yes  No

---

How many lab findings must be abnormal?

- 1
- 2
- 3
- 4
- >4

---

Which abnormal labs are included as potentially meeting criteria for MIS-C at your center? Check all that apply.

- Elevated CRP
- Elevated ESR
- Elevated white blood cell count
- Neutrophilia
- Lymphopenia
- Thrombocytopenia
- Anemia
- Hyponatremia
- Elevated Creatinine
- Elevated BNP or proBNP
- Elevated Troponin
- Hypoalbuminemia
- Elevated AST or ALT
- Elevated ferritin
- Elevated D-Dimer
- Pyuria
- Other

---

Please specify other lab criteria included.

\_\_\_\_\_

---

Is positive SARS-CoV-2 testing required for inclusion?

- Yes  No

---

Is prior exposure to someone with COVID required?

- Yes  No

---

What positive SARS-CoV-2 testing meets inclusion criteria? Check all that apply.

- Nasopharyngeal/Oropharyngeal PCR
- Stool PCR
- IgA Antibody
- IgG Antibody
- IgM Antibody
- Antigen Testing
- Other

---

Please specify other positive SARS-CoV-2 testing that meets inclusion criteria.

\_\_\_\_\_

---

Do you know the specific Antibody test (company and any other information) that your hospital uses?

- Yes  No

---

Please specify the Antibody test that your hospital uses.

\_\_\_\_\_

---

Comments regarding inclusion criteria for diagnosis of MIS-C

Evaluation of Patients with Suspected or Confirmed MIS-C  
 Option to select for ALL patients or Only Selected Patients

Including initial labs, what labs are ordered for patients with concern for MIS-C?

|                                     | Some Patients         | All Patients          |
|-------------------------------------|-----------------------|-----------------------|
| CBC w/ diff                         | <input type="radio"/> | <input type="radio"/> |
| Chem panel                          | <input type="radio"/> | <input type="radio"/> |
| LFTs                                | <input type="radio"/> | <input type="radio"/> |
| CRP                                 | <input type="radio"/> | <input type="radio"/> |
| ESR                                 | <input type="radio"/> | <input type="radio"/> |
| Urinalysis (with reflex culture)    | <input type="radio"/> | <input type="radio"/> |
| Urine creatinine and protein        | <input type="radio"/> | <input type="radio"/> |
| BNP or proBNP                       | <input type="radio"/> | <input type="radio"/> |
| Troponin                            | <input type="radio"/> | <input type="radio"/> |
| CK-MB                               | <input type="radio"/> | <input type="radio"/> |
| Ferritin                            | <input type="radio"/> | <input type="radio"/> |
| D-dimer                             | <input type="radio"/> | <input type="radio"/> |
| Prottime and INR                    | <input type="radio"/> | <input type="radio"/> |
| aPTT                                | <input type="radio"/> | <input type="radio"/> |
| Von Willebrand antigen              | <input type="radio"/> | <input type="radio"/> |
| Blood culture                       | <input type="radio"/> | <input type="radio"/> |
| Procalcitonin                       | <input type="radio"/> | <input type="radio"/> |
| LDH                                 | <input type="radio"/> | <input type="radio"/> |
| Triglycerides                       | <input type="radio"/> | <input type="radio"/> |
| Amylase                             | <input type="radio"/> | <input type="radio"/> |
| Lipase                              | <input type="radio"/> | <input type="radio"/> |
| Vitamin D level                     | <input type="radio"/> | <input type="radio"/> |
| Cytokine panel                      | <input type="radio"/> | <input type="radio"/> |
| IL-6                                | <input type="radio"/> | <input type="radio"/> |
| ANA                                 | <input type="radio"/> | <input type="radio"/> |
| C3                                  | <input type="radio"/> | <input type="radio"/> |
| C4                                  | <input type="radio"/> | <input type="radio"/> |
| CXCL9                               | <input type="radio"/> | <input type="radio"/> |
| Respiratory viral panel             | <input type="radio"/> | <input type="radio"/> |
| CMV PCR                             | <input type="radio"/> | <input type="radio"/> |
| EBV PCR                             | <input type="radio"/> | <input type="radio"/> |
| Parvovirus PCR                      | <input type="radio"/> | <input type="radio"/> |
| Adenovirus PCR                      | <input type="radio"/> | <input type="radio"/> |
| SARS-CoV-2:                         | <input type="radio"/> | <input type="radio"/> |
| Nasopharyngeal/Oropharyngeal<br>PCR | <input type="radio"/> | <input type="radio"/> |

|                             |                       |                       |
|-----------------------------|-----------------------|-----------------------|
| SARS-CoV-2: Stool PCR       | <input type="radio"/> | <input type="radio"/> |
| SARS-CoV-2: IgA Antibody    | <input type="radio"/> | <input type="radio"/> |
| SARS-CoV-2: IgG Antibody    | <input type="radio"/> | <input type="radio"/> |
| SARS-CoV-2: IgM Antibody    | <input type="radio"/> | <input type="radio"/> |
| SARS-CoV-2: Antigen Testing | <input type="radio"/> | <input type="radio"/> |
| Other                       | <input type="radio"/> | <input type="radio"/> |

Please specify what other labs are ordered for patients with concern for MIS-C.

\_\_\_\_\_

What imaging studies are typically ordered for patients with concern for MIS-C?

|                      | Some Patients         | All Patients          |
|----------------------|-----------------------|-----------------------|
| CXR                  | <input type="radio"/> | <input type="radio"/> |
| EKG                  | <input type="radio"/> | <input type="radio"/> |
| Echocardiogram       | <input type="radio"/> | <input type="radio"/> |
| Abdominal Ultrasound | <input type="radio"/> | <input type="radio"/> |
| Chest CT             | <input type="radio"/> | <input type="radio"/> |
| Abdominal CT         | <input type="radio"/> | <input type="radio"/> |
| Other                | <input type="radio"/> | <input type="radio"/> |

Please specify what other supplemental imaging/procedures are obtained.

\_\_\_\_\_

What consulting services are typically ordered for patients with concern for MIS-C?

|                    | Some of the Patients  | All of the Patients   |
|--------------------|-----------------------|-----------------------|
| Cardiology         | <input type="radio"/> | <input type="radio"/> |
| Infectious Disease | <input type="radio"/> | <input type="radio"/> |
| Rheumatology       | <input type="radio"/> | <input type="radio"/> |
| Hematology         | <input type="radio"/> | <input type="radio"/> |
| Nephrology         | <input type="radio"/> | <input type="radio"/> |
| Other              | <input type="radio"/> | <input type="radio"/> |

Please specify what other consults are ordered.

\_\_\_\_\_

Comments regarding evaluation of patients with suspected or confirmed MIS-C

\_\_\_\_\_

Management

\_\_\_\_\_

Which of the following treatments are routinely given?

|                              | Mild cases               | Moderate cases           | Severe cases             | Use Regardless of Severity |
|------------------------------|--------------------------|--------------------------|--------------------------|----------------------------|
| IVIG                         | <input type="checkbox"/> | <input type="checkbox"/> | <input type="checkbox"/> | <input type="checkbox"/>   |
| Corticosteroids              | <input type="checkbox"/> | <input type="checkbox"/> | <input type="checkbox"/> | <input type="checkbox"/>   |
| Aspirin                      | <input type="checkbox"/> | <input type="checkbox"/> | <input type="checkbox"/> | <input type="checkbox"/>   |
| Heparin/LMWH                 | <input type="checkbox"/> | <input type="checkbox"/> | <input type="checkbox"/> | <input type="checkbox"/>   |
| Clopidogrel (Plavix)         | <input type="checkbox"/> | <input type="checkbox"/> | <input type="checkbox"/> | <input type="checkbox"/>   |
| Warfarin (Coumadin)          | <input type="checkbox"/> | <input type="checkbox"/> | <input type="checkbox"/> | <input type="checkbox"/>   |
| Anakinra (IL-1 inhibitor)    | <input type="checkbox"/> | <input type="checkbox"/> | <input type="checkbox"/> | <input type="checkbox"/>   |
| Tocilizumab (IL-6 inhibitor) | <input type="checkbox"/> | <input type="checkbox"/> | <input type="checkbox"/> | <input type="checkbox"/>   |
| Antibiotics                  | <input type="checkbox"/> | <input type="checkbox"/> | <input type="checkbox"/> | <input type="checkbox"/>   |
| Remdesivir                   | <input type="checkbox"/> | <input type="checkbox"/> | <input type="checkbox"/> | <input type="checkbox"/>   |
| Hydroxychloroquine           | <input type="checkbox"/> | <input type="checkbox"/> | <input type="checkbox"/> | <input type="checkbox"/>   |
| Vasopressors                 | <input type="checkbox"/> | <input type="checkbox"/> | <input type="checkbox"/> | <input type="checkbox"/>   |
| Other                        | <input type="checkbox"/> | <input type="checkbox"/> | <input type="checkbox"/> | <input type="checkbox"/>   |

Other Treatment Name \_\_\_\_\_

Medication Dosage Per Severity

IVIG: Mild Dosage Amount: \_\_\_\_\_

IVIG: Moderate Dosage Amount: \_\_\_\_\_

IVIG: Severe Dosage Amount: \_\_\_\_\_

IVIG Dosage Amount: \_\_\_\_\_

Corticosteroids: Mild Dosage Amount & Agent: \_\_\_\_\_

Corticosteroids: Moderate Dosage Amount & Agent: \_\_\_\_\_

Corticosteroids: Severe Dosage Amount & Agent: : \_\_\_\_\_

Corticosteroids Dosage Amount & Agent: : \_\_\_\_\_

Aspirin: Mild Dosage Amount: \_\_\_\_\_



---

Aspirin: Moderate Dosage Amount:

---

---

Aspirin: Severe Dosage Amount:

---

---

Aspirin Dosage Amount:

---

---

Heparin/LMWH: Mild Prophylactic Dose or Targeted  
Therapeutic Level :

---

---

Heparin/LMWH: Moderate Prophylactic Dose or Targeted  
Therapeutic Level :

---

---

Heparin/LMWH: Severe Prophylactic Dose or Targeted  
Therapeutic Level :

---

---

Heparin/LMWH Prophylactic Dose or Targeted  
Therapeutic Level :

---

---

Plavix: Mild Dosage Amount:

---

---

Plavix: Moderate Dosage Amount:

---

---

Plavix: Severe Dosage Amount:

---

---

Plavix Dosage Amount:

---

---

Warfarin: Mild Dosage Amount:

---

---

Warfarin: Moderate Dosage Amount:

---

---

Warfarin: Severe Dosage Amount:

---

---

Warfarin: Severe Dosage Amount:

---

---

Anakinra: Mild Dosage Amount:

---

---

Anakinra: Moderate Dosage Amount:

---

---

Anakinra: Severe Dosage Amount:

---

---

Anakinra Dosage Amount:

---

---

Tocilizumab: Mild Dosage Amount:

---

---

Tocilizumab: Moderate Dosage Amount:

---

---

Tocilizumab: Severe Dosage Amount:

---

---

Tocilizumab Dosage Amount:

---

---

Antibiotics: Mild Dosage Amount and Name of Drug:

---

---

Antibiotics: Moderate Dosage Amount and Name of Drug:

---

---

Antibiotics: Severe Dosage Amount and Name of Drug:

---

---

Antibiotics Dosage Amount and Name of Drug:

---

---

Remdesivir: Mild Dosage Amount:

---

---

Remdesivir: Moderate Dosage Amount:

---

---

Remdesivir: Severe Dosage Amount:

---

---

Remdesivir Dosage Amount:

---

---

Hydroxychloroquine: Mild Dosage Amount:

---

---

Hydroxychloroquine: Moderate Dosage Amount:

---

---

Hydroxychloroquine: Severe Dosage Amount:

---

---

Hydroxychloroquine Dosage Amount:

---

---

Vasopressors: Mild Dosage Amount and Name of Drug:

---

---

Vasopressors: Moderate Dosage Amount and Name of Drug:

---

---

Vasopressors: Severe Dosage Amount and Name of Drug:

---

---

Vasopressors Dosage Amount and Name of Drug:

---

---

[tx\_other\_name]: Mild Dosage Amount:

---

---

[tx\_other\_name]: Moderate Dosage Amount:

---

---

[tx\_other\_name]: Severe Dosage Amount:

---

---

[tx\_other\_name] Dosage Amount:

---

---

How is severity defined at your center?

---

If patient does not improve with first dose of IVIG, is a 2nd dose recommended?

Yes  No

---

Does your center use a maximum dose for IVIG?

Yes  No

---

What is the maximum dose?

---

\_\_\_\_\_

---

Comments regarding management of patients with suspected or confirmed MIS-C:

---

Follow-Up

---

Are your MIS-C follow-up guidelines the same as the published AHA Kawasaki Disease guidelines?

No  
 Yes  
 I don't know

Do your follow-up guidelines vary by presence of coronary involvement?

Yes  No

What medications are patients routinely discharged home on?

|          | Mild/Small Coronary Dilation | Moderate/Medium Coronary Dilation | Severe/Large Coronary Dilation | Use Regardless of Severity |
|----------|------------------------------|-----------------------------------|--------------------------------|----------------------------|
| Aspirin  | <input type="checkbox"/>     | <input type="checkbox"/>          | <input type="checkbox"/>       | <input type="checkbox"/>   |
| LMWH     | <input type="checkbox"/>     | <input type="checkbox"/>          | <input type="checkbox"/>       | <input type="checkbox"/>   |
| Plavix   | <input type="checkbox"/>     | <input type="checkbox"/>          | <input type="checkbox"/>       | <input type="checkbox"/>   |
| Warfarin | <input type="checkbox"/>     | <input type="checkbox"/>          | <input type="checkbox"/>       | <input type="checkbox"/>   |
| Other    | <input type="checkbox"/>     | <input type="checkbox"/>          | <input type="checkbox"/>       | <input type="checkbox"/>   |

Other Treatment Name \_\_\_\_\_

Discharge Medication Dosage Per Severity

Aspirin: Mild Dosage Amount: \_\_\_\_\_

Aspirin: Moderate Dosage Amount: \_\_\_\_\_

Aspirin: Severe Dosage Amount: \_\_\_\_\_

Aspirin Dosage Amount: \_\_\_\_\_

LMWH: Mild Prophylactic Dose or Targeted Therapeutic Level: \_\_\_\_\_

LMWH: Moderate Prophylactic Dose or Targeted Therapeutic Level: \_\_\_\_\_

LMWH: Severe Prophylactic Dose or Targeted Therapeutic Level: \_\_\_\_\_

LMWH Prophylactic Dose or Targeted Therapeutic Level: \_\_\_\_\_

Plavix: Mild Dosage Amount: \_\_\_\_\_

Plavix: Moderate Dosage Amount: \_\_\_\_\_

Plavix: Severe Dosage Amount: \_\_\_\_\_

Plavix Dosage Amount: \_\_\_\_\_

---

Warfarin: Mild Dosage Amount:

---



---

Warfarin: Moderate Dosage Amount:

---



---

Warfarin: Severe Dosage Amount:

---



---

Warfarin Dosage Amount:

---



---

[tx\_other\_coronary\_name]: Mild Dosage Amount:

---



---

[tx\_other\_coronary\_name]: Moderate Dosage Amount:

---



---

[tx\_other\_coronary\_name]: Severe Dosage Amount:

---



---

[tx\_other\_coronary\_name] Dosage Amount:

---



---

What specialty clinic visits are recommended? Check all that apply.

- Cardiology
- Infectious Disease
- Rheumatology
- Hematology
- Nephrology
- Other

---

What other service is recommended for patient follow up?

---



---

For patients with cardiac involvement, when is outpatient echocardiogram recommended?

- Within 1 week
- Within 2 weeks
- Within 1 month
- Within 3 months
- None

---

For patients with LV dysfunction, does the protocol recommend cardiac MRI?

- No
- Yes, during hospitalization
- Yes, in 1-3 months
- Yes, in 3-6 months
- Other

---

What other time period does the protocol recommend cardiac MRI?

---

---

Is follow up cardiac MRI obtained for patients without LV dysfunction?

Yes  No

---

Comments regarding follow-up of patients with suspected or confirmed MIS-C

---

Any other comments regarding this survey?
